# Supplementary material for: Creating comics, songs and poems to make sense of decolonising the curriculum: a collaborative autoethnography patchwork
Source: HighWire-hosted journal article supplement (doi:10.1136/medhum-2023-012660), 2023-10-20
Supplement: medhum-2023-012660supp002_data_supplement.pdf [file medhum-2023-012660supp002_data_supplement.pdf]

## HOSTILE ENVIRONMENT

P. 115.

If

If your normal is

People dying of Hunger while food  
wastes away on shelves/homes lying  
empty when humanity freezes to Death.

If your normal is

People dying to uphold artificial  
lines/people drowning in oceans/  
Us burning away the surface of our  
planet.

If your normal is this.  
Give Me  
Madness

If you think about it, Any Day instead.  
Pretty Mad itself, Normality is
