# Supplementary material for: Creating comics, songs and poems to make sense of decolonising the curriculum: a collaborative autoethnography patchwork
Source: HighWire-hosted journal article supplement (doi:10.1136/medhum-2023-012660), 2023-10-20
Supplement: medhum-2023-012660supp003_data_supplement.pdf [file medhum-2023-012660supp003_data_supplement.pdf]

## Diary Entry Poem.

22 June 2018

### "International" Student.

So, today in Co-op, while buying coffee, it struck me how there's an international isle. I paid attention to what was on it. But then, I looked around - the fruit, the veg. the beverages, the snacks - everything is 'international'. A lot: completely, almost everything at least partially. 'International' was the food 'for' foreign people.

I am an international student.

I am in this international aisle on this isle as an international. In. But under

I'M NOT <sup>SCRUTINING</sup> CURRY-YET!
